# Supplementary material for: Genesis of pure Se(0) nano- and micro-structures in wastewater with nanoscale zero-valent iron (nZVI)
Source: Royal Society of Chemistry journal article supplement (doi:10.1039/c6en00231e), 2016-09-26
Supplement: c6en00231e1.pdf [file c6en00231e1.pdf]

**Electronic Supplementary Material**

Genesis of Pure Se(0) Nano- and Micro- structures  
in Wastewater  
with Nanoscale Zero-Valent Iron (nZVI)

**Xuefen Xia, Lan Ling\*, Wei-xian Zhang**

State Key Laboratory for Pollution Control

Tongji University

Shanghai, China 200092

\*Corresponding author, Email: [linglan@tongji.edu.cn](mailto:linglan@tongji.edu.cn). Phone: +86-21-18501682197.

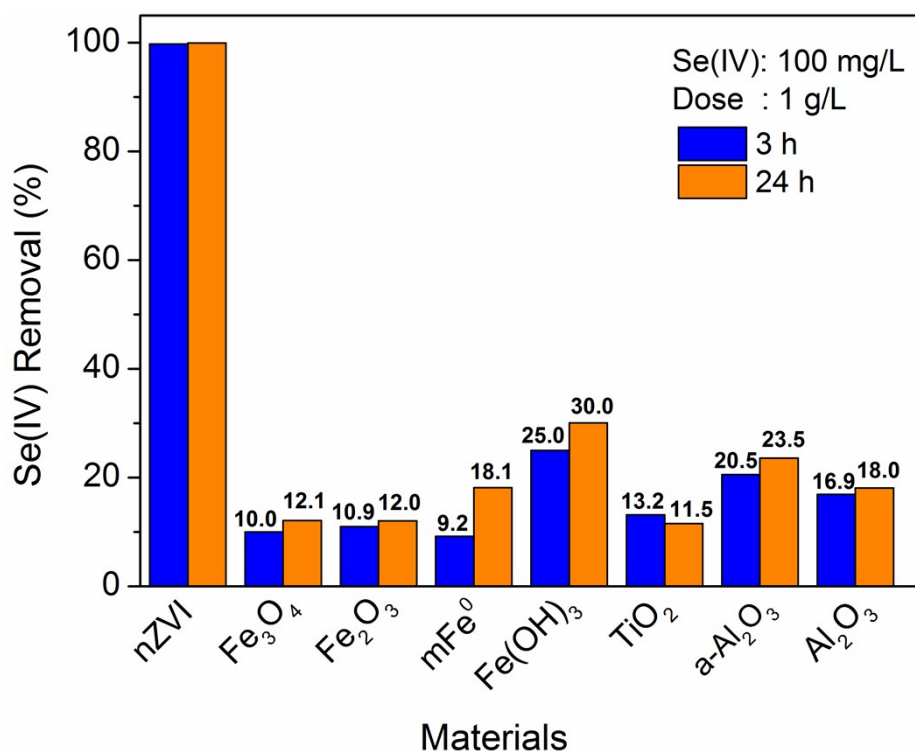

**FigureS1. Comparison of various materials on Se(IV) removal. Reactions: 1 g/L solids concentration, 100 mg/L Se(IV) at pH 7.0 in 35 ml DI water for 3 h and 24 h.**

**Table S1**

**Characteristics of the materials used in the present study**

| Material                                                                   | Particle size | Specific surface area (m <sup>2</sup> g <sup>-1</sup> )<br>From N <sub>2</sub> adsorption, BET calculation |
|----------------------------------------------------------------------------|---------------|------------------------------------------------------------------------------------------------------------|
| nanoscale zero-valent iron (nZVI) <sup>a</sup>                             | ~100 nm       | 20-60                                                                                                      |
| magnetite (Fe <sub>3</sub> O <sub>4</sub> ) <sup>b</sup>                   | < 50 nm       | > 60                                                                                                       |
| iron oxide (Fe <sub>2</sub> O <sub>3</sub> ) <sup>b</sup>                  | < 50 nm       | 50-245                                                                                                     |
| micro iron powder (mFe <sup>0</sup> ) <sup>c</sup>                         | 100 mesh      | 0.09                                                                                                       |
| ferric hydroxide (Fe(OH) <sub>3</sub> ) <sup>c</sup>                       | AR, Aladdin   | > 80                                                                                                       |
| titanium oxide (TiO <sub>2</sub> , rutile) <sup>b</sup>                    | < 100 nm      | 130-190                                                                                                    |
| aluminum oxide (Al <sub>2</sub> O <sub>3</sub> ) <sup>d</sup>              | ~ 150 mesh    | 155                                                                                                        |
| activated aluminum oxide (a- Al <sub>2</sub> O <sub>3</sub> ) <sup>d</sup> | 60-80 nm      | > 40                                                                                                       |

<sup>a</sup> Data from ref 32; <sup>b</sup> Data supplied by Sigma-Aldrich; <sup>c</sup> Data supplied by Aladdin; <sup>d</sup>Data supplied by Sinopharm Chemical Reagent (Shanghai, China).

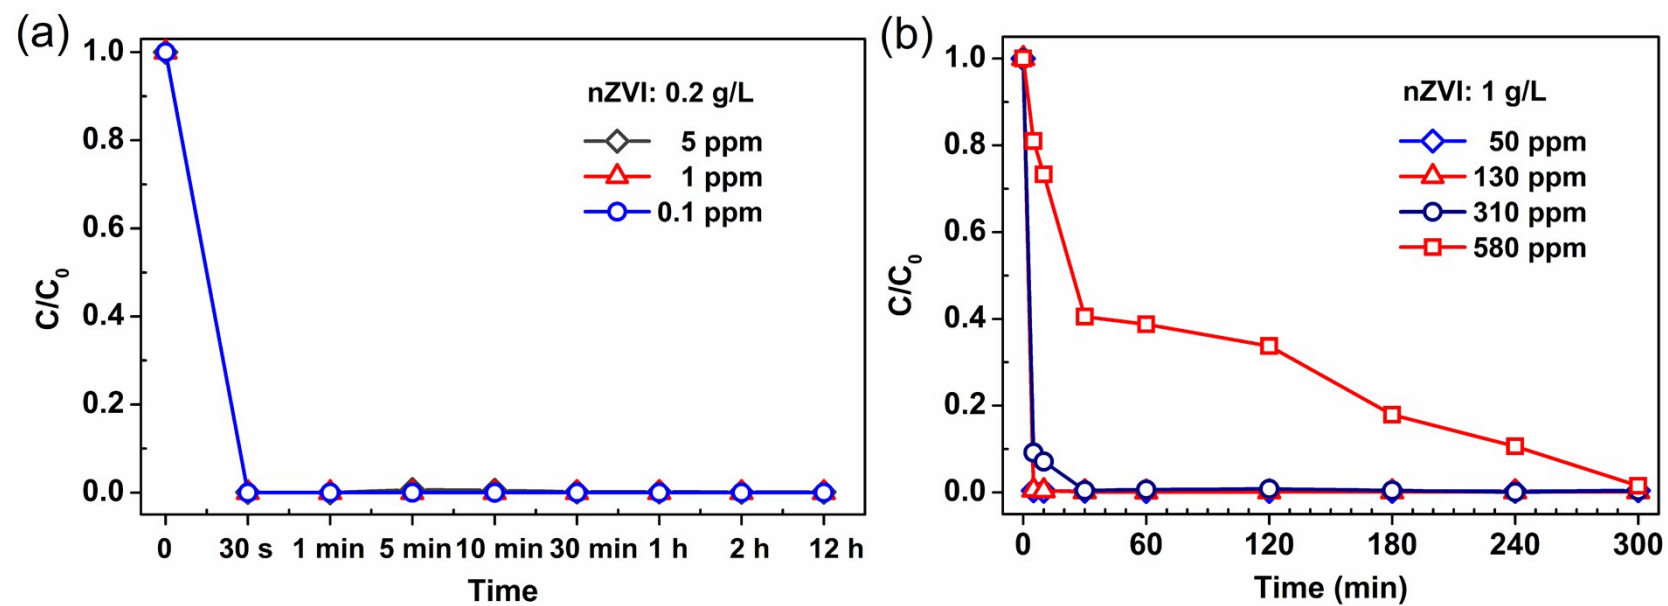

Figure S2. Effect of initial concentrations on Se(IV) removal. Initial solution pH was 7.0.

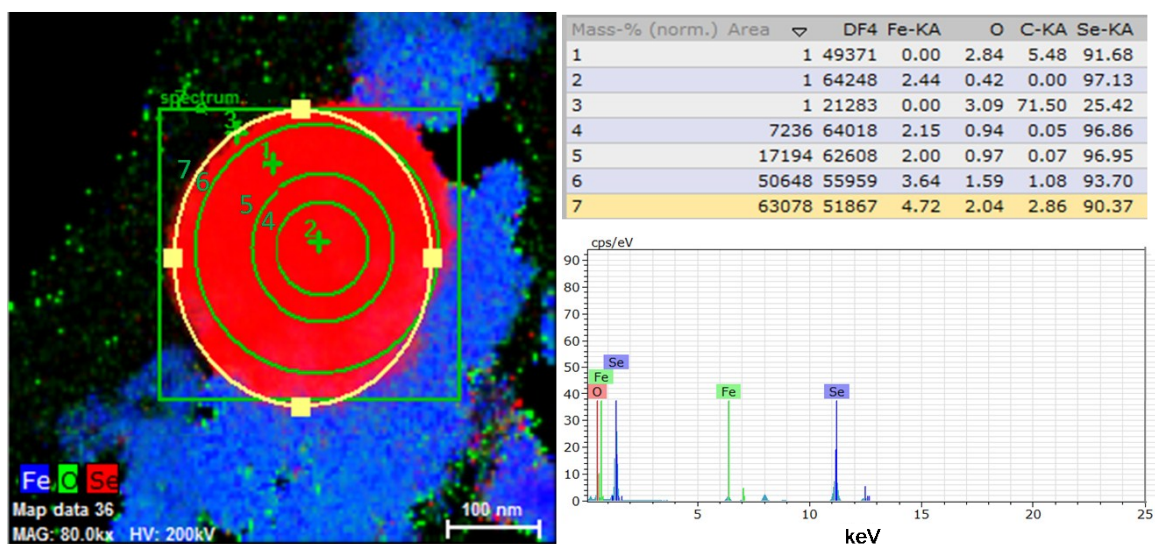

Figure S3. EDS quantitative analysis of the Se(0) nanosphere.

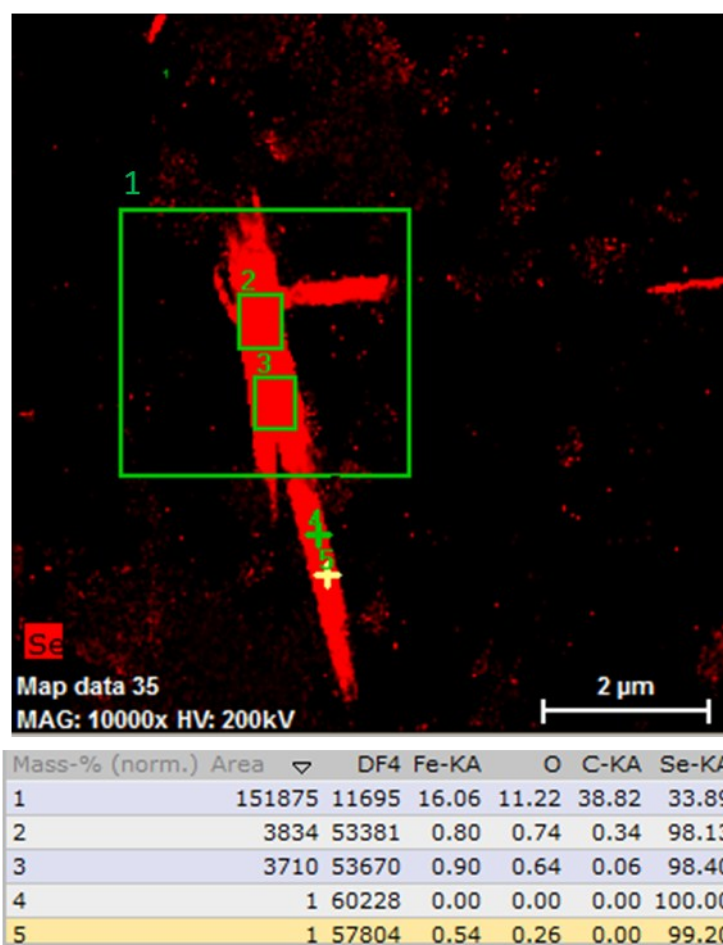

Figure S4. EDS quantitative analysis of Se(0) nanoneedles.

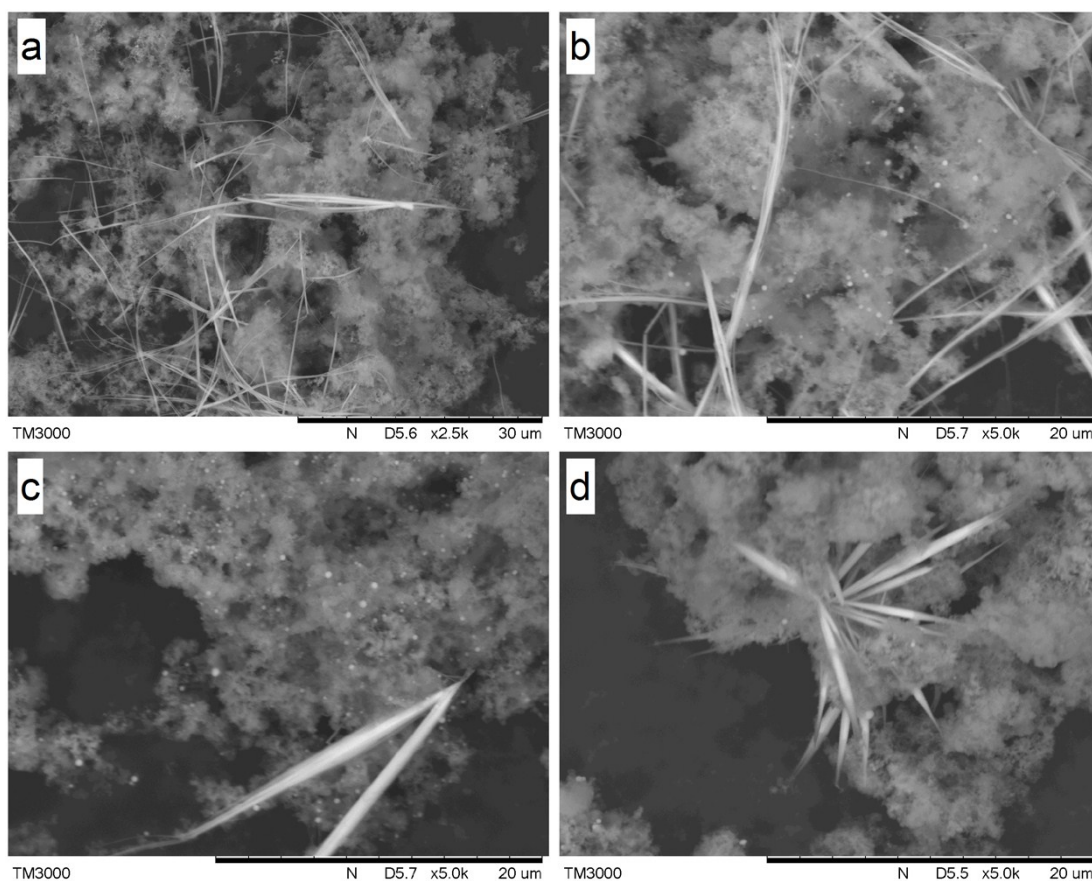

**Figure S5 SEM images of nanoparticles after (a) 10 min; (b) 40 min; (c) 3 h; (d) 24 h reaction between nZVI (0.5 g/L) and Se(IV) (100 mg/L).**

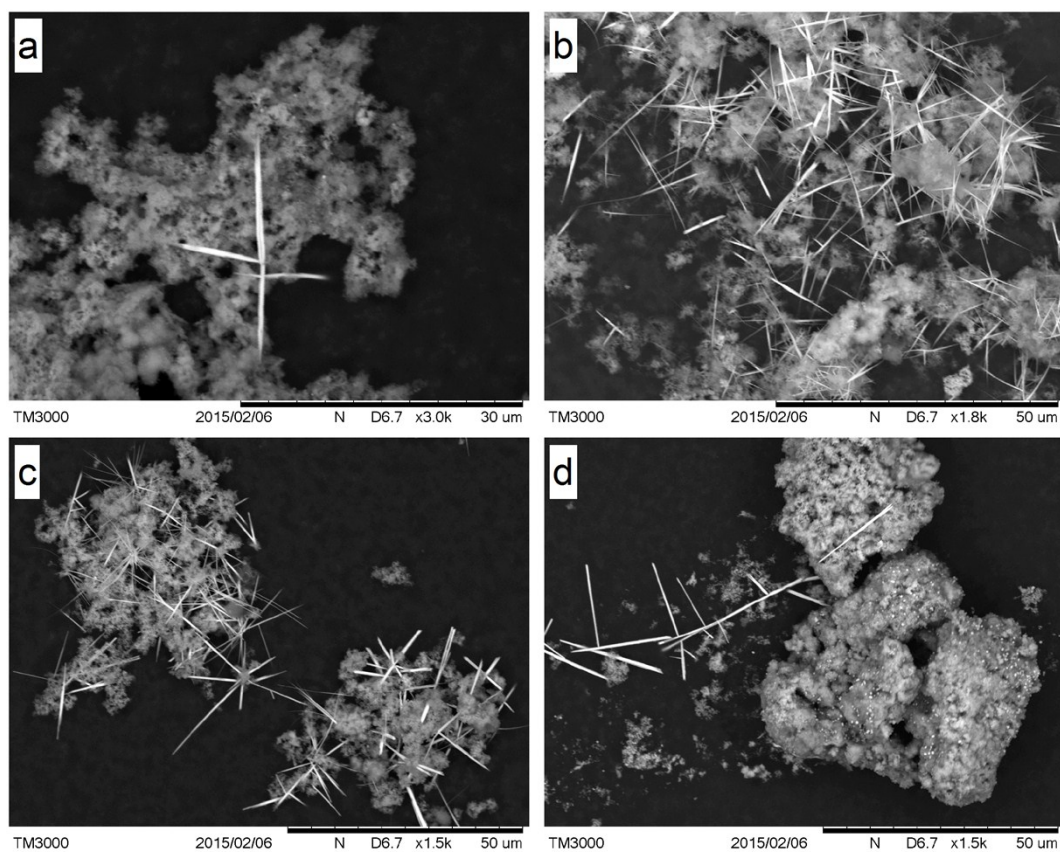

**Figure S6 SEM images of nanoparticles after 3 h reaction between nZVI (0.5 g/L) and Se(IV) ((a) 55 mg/L; (b) 150 mg/L; (c) 550 mg/L; (d) 1000 mg/L).**



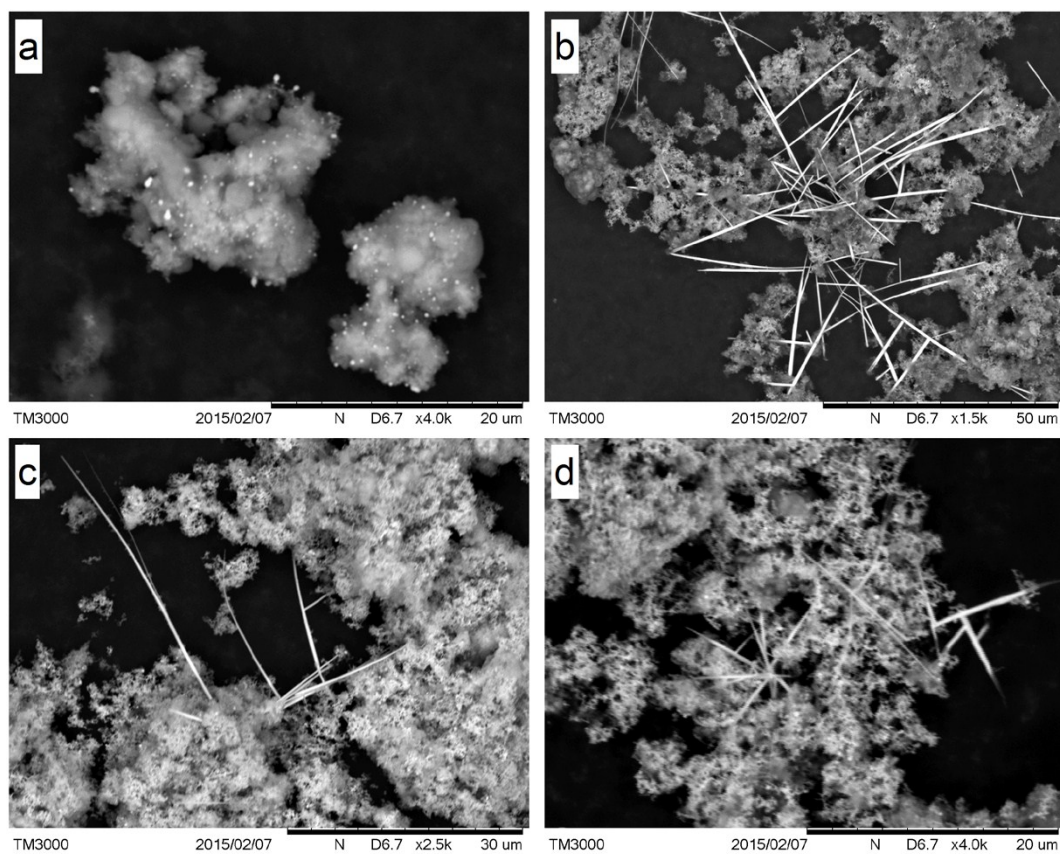

**Figure S7 SEM images of nanoparticles after 3 h reaction between nZVI ((a) 0.2 g/L; (b) 1.0 g/L; (c) 1.5 g/L; (d) 5.0 g/L) and Se(IV) (100 mg/L).**

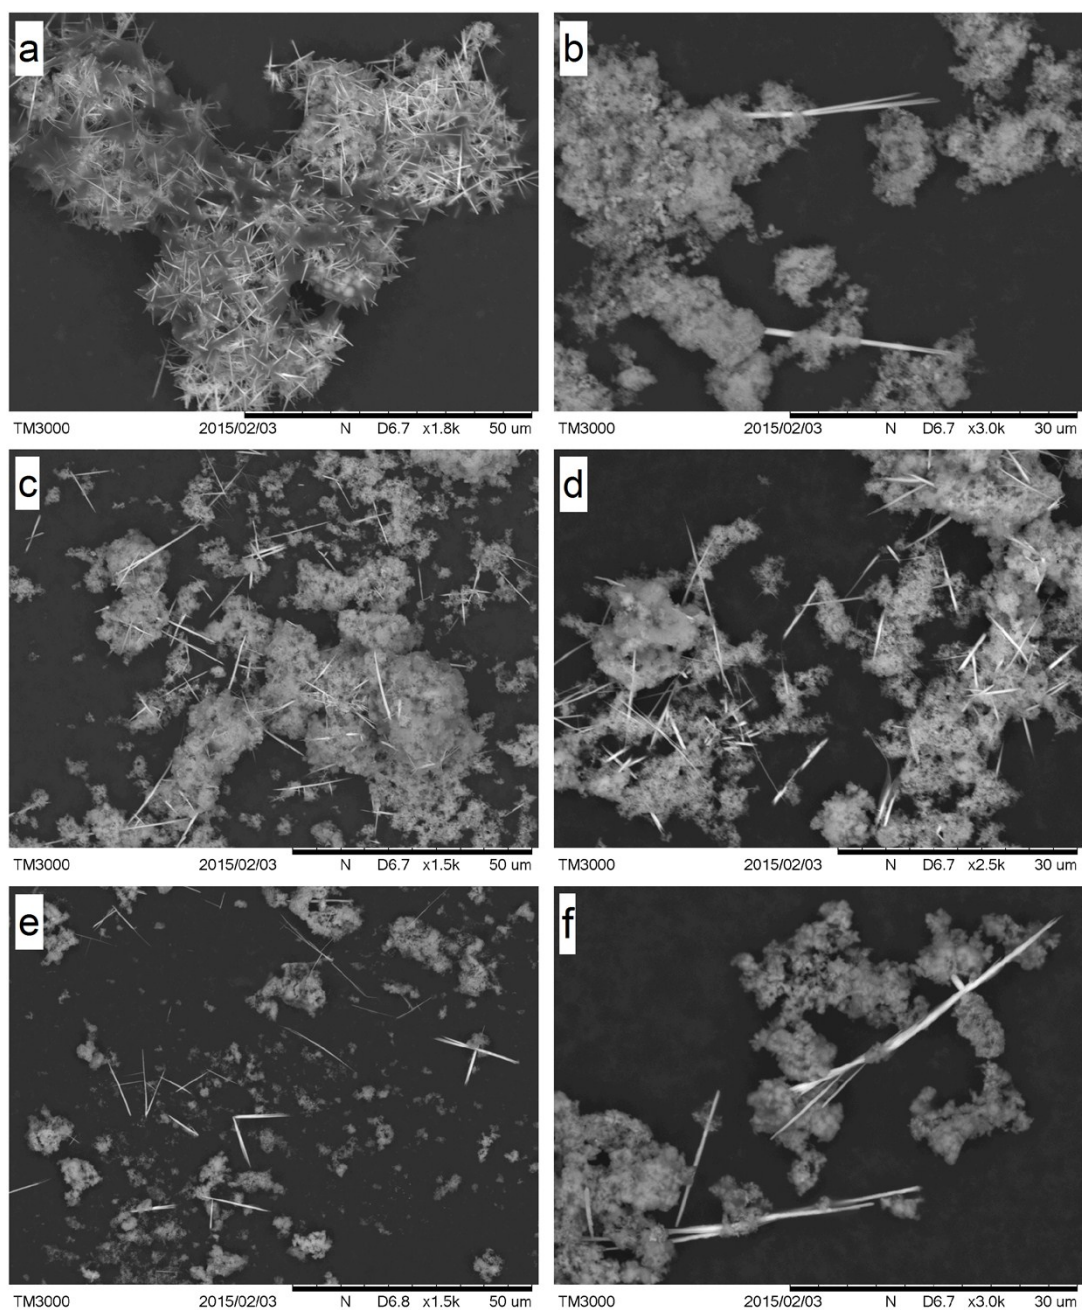

**Figure S8 SEM images of nanoparticles after 24 h reaction between nZVI ( 0.5 g/L) and Se(IV) (100 mg/L) at different initial pH ((a) pH= 2; (b) pH= 4; (c) pH= 6; (d) pH= 8; (e) pH= 10; (f) pH= 12) .**



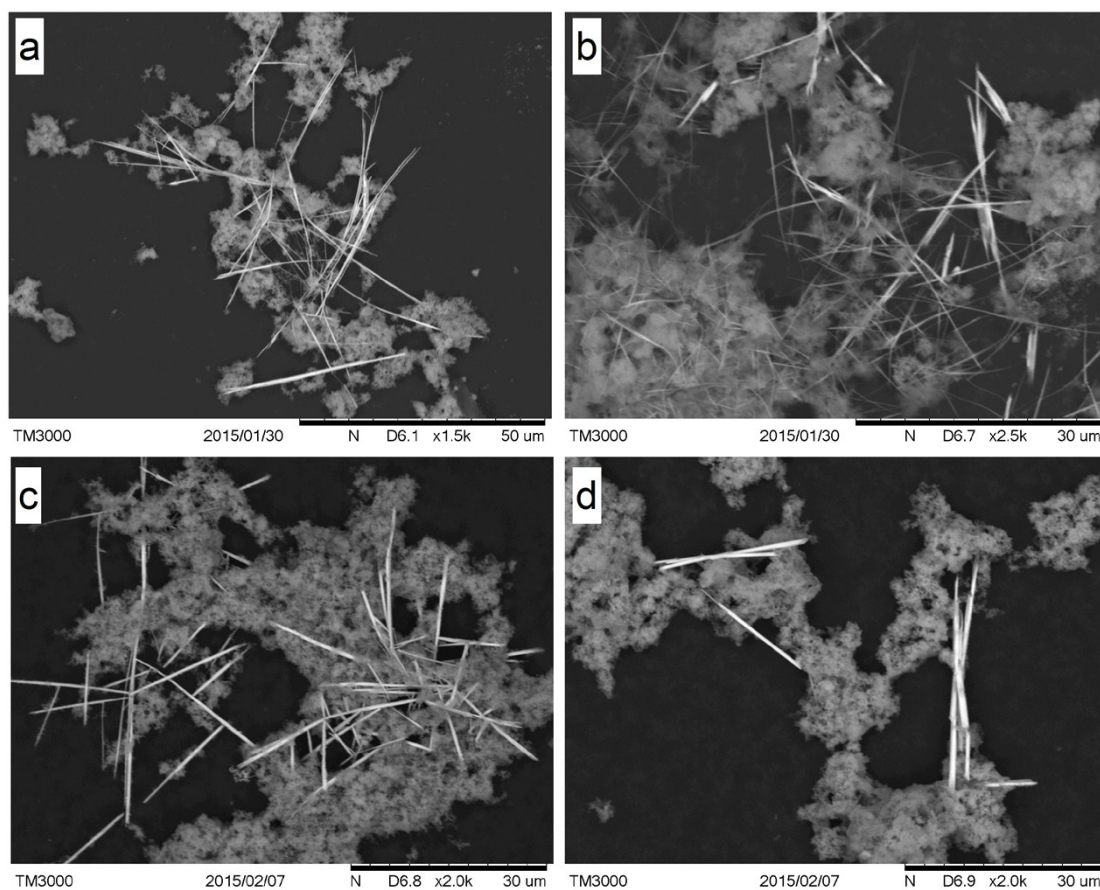

**Figure S9 SEM images of nanoparticles after 3 h reaction between nZVI[ 0.5 g/L) and Se(IV) (100 mg/L) at different temperature ((a)15 °C; (b) 25 °C; (c) 35 °C; (d) 45 °C).**
